# Supplementary material for: West-Siberian Chernozem: How Vegetation and Tillage Shape Its Bacteriobiome
Source: MDPI journal article supplement (doi:10.3390/microorganisms11102431), 2023-09-28
Supplement: s1 [file s1]

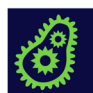

## Supplementary material

**Table S2.** Relative abundance (% , mean) of the dominant bacterial families in Chernozem of the experimental fields in the south of West Siberia

| Taxon                                    | Undisturbed         |                   | Ploughed          |                   | No till           |                    |
|------------------------------------------|---------------------|-------------------|-------------------|-------------------|-------------------|--------------------|
|                                          | 0-5 cm              | 5-15 cm           | 0-5 cm            | 5-15 cm           | 0-5 cm            | 5-15 cm            |
| <i>Bacillaceae</i> <sup>1</sup>          | 1.0 <sup>b, 1</sup> | 1.1 <sup>b</sup>  | 0.1 <sup>a</sup>  | 0.0 <sup>a</sup>  | 0.0 <sup>a</sup>  | 0.4 <sup>ab</sup>  |
| <i>Blastocatellaceae</i>                 | 0.4 <sup>a</sup>    | 0.1 <sup>a</sup>  | 1.0 <sup>c</sup>  | 0.4 <sup>ab</sup> | 0.6 <sup>b</sup>  | 0.2 <sup>a</sup>   |
| <i>Bradyrhizobiaceae</i>                 | 2.0 <sup>b</sup>    | 0.2 <sup>a</sup>  | 0.3 <sup>a</sup>  | 0.5 <sup>a</sup>  | 0.4 <sup>a</sup>  | 0.5 <sup>a</sup>   |
| <i>Chitinophagaceae</i>                  | 1.0 <sup>b</sup>    | 0.2 <sup>a</sup>  | 0.5 <sup>a</sup>  | 0.3 <sup>a</sup>  | 1.1 <sup>b</sup>  | 0.4 <sup>a</sup>   |
| <i>Gaiellaceae</i>                       | 1.5 <sup>a</sup>    | 13.9 <sup>c</sup> | 6.2 <sup>b</sup>  | 11.7 <sup>c</sup> | 2.9 <sup>a</sup>  | 10.2 <sup>bc</sup> |
| <i>Gemmatimonadaceae</i>                 | 1.8 <sup>b</sup>    | 0.6 <sup>a</sup>  | 3.0 <sup>c</sup>  | 1.8 <sup>b</sup>  | 4.4 <sup>d</sup>  | 1.6 <sup>b</sup>   |
| <i>Geodermatophilaceae</i>               | 0.1 <sup>a</sup>    | 0.0 <sup>a</sup>  | 3.8 <sup>c</sup>  | 1.5 <sup>b</sup>  | 5.6 <sup>c</sup>  | 1.6 <sup>b</sup>   |
| <i>Iamiaceae</i>                         | 0.7 <sup>a</sup>    | 0.9 <sup>a</sup>  | 0.7 <sup>ab</sup> | 1.0 <sup>b</sup>  | 0.6 <sup>a</sup>  | 1.1 <sup>b</sup>   |
| <i>Ilumatobacteraceae</i>                | 0.9 <sup>c</sup>    | 0.2 <sup>a</sup>  | 0.9 <sup>c</sup>  | 0.4 <sup>ab</sup> | 1.0 <sup>c</sup>  | 0.6 <sup>b</sup>   |
| <i>Kribbellaceae</i>                     | 1.0 <sup>b</sup>    | 1.0 <sup>b</sup>  | 0.4 <sup>a</sup>  | 0.5 <sup>ab</sup> | 0.9 <sup>b</sup>  | 0.8 <sup>ab</sup>  |
| <i>Methylobacteriaceae</i>               | 0.5 <sup>b</sup>    | 0.1 <sup>a</sup>  | 1.0 <sup>c</sup>  | 0.3 <sup>ab</sup> | 1.9 <sup>d</sup>  | 0.4 <sup>ab</sup>  |
| <i>Micromonosporaceae</i>                | 6.5 <sup>c</sup>    | 1.0 <sup>a</sup>  | 1.1 <sup>a</sup>  | 0.7 <sup>a</sup>  | 2.5 <sup>b</sup>  | 1.1 <sup>a</sup>   |
| <i>Mycobacteriaceae</i>                  | 1.0 <sup>b</sup>    | 0.3 <sup>a</sup>  | 0.2 <sup>a</sup>  | 0.1 <sup>a</sup>  | 0.6 <sup>ab</sup> | 0.2 <sup>a</sup>   |
| <i>Nocardioidaceae</i>                   | 1.8 <sup>b</sup>    | 0.1 <sup>a</sup>  | 1.9 <sup>bc</sup> | 0.4 <sup>a</sup>  | 2.5 <sup>c</sup>  | 0.4 <sup>a</sup>   |
| <i>Propionibacteriaceae</i>              | 2.6 <sup>a</sup>    | 4.1 <sup>ab</sup> | 1.9 <sup>a</sup>  | 2.4 <sup>a</sup>  | 5.1 <sup>b</sup>  | 4.1 <sup>ab</sup>  |
| <i>Pseudonocardiaceae</i>                | 3.9 <sup>c</sup>    | 0.5 <sup>a</sup>  | 1.1 <sup>a</sup>  | 0.7 <sup>a</sup>  | 2.7 <sup>b</sup>  | 1.0 <sup>a</sup>   |
| <i>Rubrobacteraceae</i>                  | 3.7 <sup>ab</sup>   | 2.2 <sup>a</sup>  | 6.8 <sup>b</sup>  | 4.4 <sup>ab</sup> | 5.7 <sup>b</sup>  | 3.1 <sup>ab</sup>  |
| <i>Solirubrobacteraceae</i>              | 0.8 <sup>a</sup>    | 1.5 <sup>a</sup>  | 1.4 <sup>a</sup>  | 1.3 <sup>a</sup>  | 1.8 <sup>a</sup>  | 1.0 <sup>a</sup>   |
| <i>Sphaerobacteraceae</i>                | 0.1 <sup>a</sup>    | 0.1 <sup>a</sup>  | 1.0 <sup>c</sup>  | 0.6 <sup>b</sup>  | 0.7 <sup>bc</sup> | 0.4 <sup>ab</sup>  |
| un. <sup>2</sup> <i>Acidimicrobiales</i> | 0.9 <sup>b</sup>    | 1.4 <sup>c</sup>  | 0.4 <sup>a</sup>  | 1.0 <sup>b</sup>  | 0.4 <sup>a</sup>  | 1.4 <sup>c</sup>   |
| un. <i>Myxococcales</i>                  | 1.3 <sup>bc</sup>   | 0.2 <sup>a</sup>  | 1.0 <sup>b</sup>  | 0.5 <sup>a</sup>  | 1.4 <sup>c</sup>  | 0.3 <sup>a</sup>   |
| un. <i>Rhizobiales</i>                   | 4.3 <sup>b</sup>    | 4.2 <sup>b</sup>  | 1.5 <sup>a</sup>  | 1.8 <sup>a</sup>  | 0.9 <sup>a</sup>  | 2.3 <sup>a</sup>   |
| un. <i>Solirubrobacterales</i>           | 9.1 <sup>c</sup>    | 8.9 <sup>c</sup>  | 4.8 <sup>a</sup>  | 5.5 <sup>a</sup>  | 5.8 <sup>ab</sup> | 7.0 <sup>bc</sup>  |

<sup>1</sup> Different letters in rows indicate that the values are different ( $P \leq 0.05$ , Fisher's LSD test); <sup>2</sup> un. stands for unclassified.
