# Supplementary material for: West-Siberian Chernozem: How Vegetation and Tillage Shape Its Bacteriobiome
Source: MDPI journal article supplement (doi:10.3390/microorganisms11102431), 2023-09-28
Supplement: s1 [file s1]

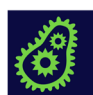

## Supplementary material

**Table S1.** Relative abundance (% , mean) of the dominant bacterial orders in Chernozem of the experimental fields in the south of West Siberia

| Taxon                                   | Undisturbed          |                   | Ploughed           |                    | No till           |                    |
|-----------------------------------------|----------------------|-------------------|--------------------|--------------------|-------------------|--------------------|
|                                         | 0-5 cm               | 5-15 cm           | 0-5 cm             | 5-15 cm            | 0-5 cm            | 5-15 cm            |
| <i>Acidimicrobiales</i>                 | 2.6 <sup>ab, 1</sup> | 2.4 <sup>ab</sup> | 2.0 <sup>a</sup>   | 2.4 <sup>ab</sup>  | 2.0 <sup>a</sup>  | 3.0 <sup>b</sup>   |
| <i>Bacillales</i>                       | 1.3 <sup>ab</sup>    | 1.6 <sup>b</sup>  | 0.2 <sup>a</sup>   | 0.3 <sup>a</sup>   | 0.5 <sup>a</sup>  | 0.7 <sup>ab</sup>  |
| <i>Blastocatellales</i>                 | 1.0 <sup>b</sup>     | 0.2 <sup>a</sup>  | 1.2 <sup>b</sup>   | 0.4 <sup>a</sup>   | 0.9 <sup>b</sup>  | 0.3 <sup>a</sup>   |
| <i>Chitinophagales</i>                  | 1.0 <sup>b</sup>     | 0.2 <sup>a</sup>  | 0.5 <sup>a</sup>   | 0.3 <sup>a</sup>   | 1.1 <sup>b</sup>  | 0.4 <sup>a</sup>   |
| <i>Gaiellales</i>                       | 1.5 <sup>a</sup>     | 13.9 <sup>c</sup> | 6.2 <sup>b</sup>   | 11.7 <sup>c</sup>  | 2.9 <sup>a</sup>  | 10.2 <sup>c</sup>  |
| <i>Gemmatimonadales</i>                 | 1.8 <sup>b</sup>     | 0.6 <sup>a</sup>  | 3.0 <sup>c</sup>   | 1.8 <sup>b</sup>   | 4.4 <sup>c</sup>  | 1.6 <sup>b</sup>   |
| <i>Geodermatophilales</i>               | 0.1 <sup>a</sup>     | 0.0 <sup>a</sup>  | 3.8 <sup>c</sup>   | 1.5 <sup>b</sup>   | 5.6 <sup>c</sup>  | 1.6 <sup>b</sup>   |
| Gp16                                    | 2.1 <sup>a</sup>     | 5.5 <sup>b</sup>  | 12.4 <sup>c</sup>  | 10.4 <sup>c</sup>  | 4.6 <sup>ab</sup> | 4.3 <sup>ab</sup>  |
| Gp3                                     | 0.4 <sup>b</sup>     | 0.1 <sup>a</sup>  | 1.0 <sup>c</sup>   | 0.6 <sup>b</sup>   | 1.0 <sup>c</sup>  | 0.4 <sup>b</sup>   |
| Gp4                                     | 2.7 <sup>c</sup>     | 2.9 <sup>c</sup>  | 0.2 <sup>a</sup>   | 0.4 <sup>a</sup>   | 0.4 <sup>a</sup>  | 1.5 <sup>b</sup>   |
| Gp6                                     | 10.9 <sup>b</sup>    | 7.1 <sup>a</sup>  | 12.4 <sup>b</sup>  | 14.8 <sup>b</sup>  | 7.3 <sup>a</sup>  | 13.6 <sup>b</sup>  |
| <i>Micromonosporales</i>                | 6.5 <sup>c</sup>     | 1.0 <sup>a</sup>  | 1.1 <sup>a</sup>   | 0.7 <sup>a</sup>   | 2.5 <sup>b</sup>  | 1.1 <sup>a</sup>   |
| <i>Mycobacteriales</i>                  | 1.0 <sup>b</sup>     | 0.3 <sup>a</sup>  | 0.3 <sup>a</sup>   | 0.2 <sup>a</sup>   | 1.0 <sup>b</sup>  | 0.3 <sup>a</sup>   |
| <i>Myxococcales</i>                     | 2.1 <sup>c</sup>     | 0.4 <sup>a</sup>  | 1.6 <sup>b</sup>   | 0.9 <sup>a</sup>   | 2.3 <sup>c</sup>  | 0.7 <sup>a</sup>   |
| <i>Propionibacteriales</i>              | 5.4 <sup>a</sup>     | 5.4 <sup>a</sup>  | 4.3 <sup>a</sup>   | 3.4 <sup>a</sup>   | 8.6 <sup>b</sup>  | 5.5 <sup>a</sup>   |
| <i>Pseudonocardiales</i>                | 3.9 <sup>c</sup>     | 0.5 <sup>a</sup>  | 1.1 <sup>a</sup>   | 0.7 <sup>a</sup>   | 2.7 <sup>b</sup>  | 1.0 <sup>a</sup>   |
| <i>Rhizobiales</i>                      | 7.2 <sup>b</sup>     | 4.8 <sup>ab</sup> | 3.2 <sup>a</sup>   | 2.9 <sup>a</sup>   | 3.9 <sup>a</sup>  | 3.6 <sup>a</sup>   |
| <i>Rhodospirillales</i>                 | 0.9 <sup>b</sup>     | 0.2 <sup>a</sup>  | 1.4 <sup>c</sup>   | 0.9 <sup>b</sup>   | 1.9 <sup>c</sup>  | 0.7 <sup>b</sup>   |
| <i>Rubrobacterales</i>                  | 3.7 <sup>ac</sup>    | 2.2 <sup>a</sup>  | 6.8 <sup>c</sup>   | 4.4 <sup>ab</sup>  | 5.7 <sup>bc</sup> | 3.1 <sup>ab</sup>  |
| <i>Solirubrobacterales</i>              | 10.1 <sup>bc</sup>   | 10.5 <sup>c</sup> | 6.4 <sup>a</sup>   | 6.9 <sup>a</sup>   | 7.8 <sup>ab</sup> | 8.1 <sup>abc</sup> |
| <i>Spartobacteria_gis</i> <sup>2</sup>  | 4.6 <sup>b</sup>     | 3.5 <sup>b</sup>  | 0.9 <sup>a</sup>   | 1.1 <sup>a</sup>   | 0.7 <sup>a</sup>  | 0.0 <sup>a</sup>   |
| <i>Sphaerobacterales</i>                | 0.1 <sup>a</sup>     | 0.1 <sup>a</sup>  | 1.0 <sup>b</sup>   | 0.6 <sup>b</sup>   | 0.7 <sup>b</sup>  | 0.4 <sup>b</sup>   |
| <i>Sphingomonadales</i>                 | 0.1 <sup>a</sup>     | 0.0 <sup>a</sup>  | 0.7 <sup>b</sup>   | 0.1 <sup>a</sup>   | 1.0 <sup>b</sup>  | 0.0 <sup>a</sup>   |
| un. <sup>3</sup> <i>Thermoleophilia</i> | 2.6 <sup>c</sup>     | 4.6 <sup>c</sup>  | 1.0 <sup>a</sup>   | 1.8 <sup>b</sup>   | 0.8 <sup>a</sup>  | 2.3 <sup>b</sup>   |
| WPS-1_gis                               | 0.6 <sup>ab</sup>    | 0.3 <sup>a</sup>  | 0.8 <sup>abc</sup> | 0.7 <sup>abc</sup> | 1.1 <sup>c</sup>  | 0.5 <sup>a</sup>   |

<sup>1</sup> Different letters in rows indicate that the values are different ( $P \leq 0.05$ , Fisher's LSD test); <sup>2</sup> gis stands for genus incertae sedis; <sup>3</sup> un. stands for unclassified.
